# Supplementary material for: Modelling changes in glutathione homeostasis as a function of quinone redox metabolism
Source: PubMed Central journal article supplement (PMC6474874; doi:10.1038/s41598-019-42799-2), 2019-04-19
Supplement: 41598_2019_42799_MOESM1_ESM.pdf [file 41598_2019_42799_MOESM1_ESM.pdf]

## SUPPLEMENTARY INFORMATION

# Modelling the changes in glutathione homeostasis as a function of quinone redox metabolism

Ross A Kelly<sup>1</sup>, Joseph Leedale<sup>2\*</sup>, Dominic Calleja<sup>3</sup>, Steven J Enoch<sup>4</sup>, Andy Harrell<sup>5</sup>, Amy E Chadwick<sup>6</sup> and Steven D Webb<sup>1</sup>

\*Correspondence:

[J.Leedale@liverpool.ac.uk](mailto:J.Leedale@liverpool.ac.uk)

<sup>2</sup>EPSRC Liverpool Centre for Mathematics in Healthcare, Department of Mathematical Sciences, University of Liverpool, Liverpool, UK

Full list of author information is available at the end of the article

## 1 Summary

In this supplementary information, a complete description of the construction of the combined quinone redox-glutathione metabolism model is presented. Appendix **A** outlines the notation used to describe the model in terms of its variables and reactions. Appendix **B** describes the model kinetic equations. Appendix **C** presents the ordinary differential equations (ODEs). Appendix **D** illustrates the validation of the combined model, specifically, by recapitulating Figures 2 and 6 from the Reed. et. al study [1]. Appendix **E** illustrates the fitting to the oxygen consumption rate data for the reduced and comproportionation models. Appendix **F** describes the initial conditions for the quinone metabolism section of the model and points the reader to the BioModels Database for the glutathione metabolism initial conditions.

## Appendix A: Notation

### A.1 Enzyme and variable acronyms

A full list of variable and enzyme names present in the combined quinone-GSH metabolism model are described here. All glutathione metabolism variables and enzymes are taken from Reed. et. al. [1].

### A.2 Non-enzyme reaction acronyms

### A.3 Model variable names

Reed et. al. [1] use three prefixes, m, c and b, to differentiate between mitochondria, cytosol and blood compartments. Metabolites present in one compartment only, or metabolite concentrations that are assumed equal in different compartments have no prefixes.

### A.4 Constant variables

Reed et. al. [1] assume that total cellular folate is divided equally between the cytosol and mitochondria, with the mitochondria occupying one quarter of the cell volume. In their study, folate is not transported into the cell nor is it catabolised. The total normal folate concentration is 13.3  $\mu\text{M}$  in the cytosol and 40  $\mu\text{M}$ .

**Table 1 Enzyme names and acronyms**

| Abbreviation                       | Enzyme names                                         |
|------------------------------------|------------------------------------------------------|
| Mitochondrial folate cycle enzymes |                                                      |
| mSHMT                              | serinehydroxymethyltransferase                       |
| mFTD                               | 10-formyltetrahydrofolate dehydrogenase              |
| mFTS                               | 10-formyltetrahydrofolate synthase                   |
| mFTS                               | 10-formyltetrahydrofolate synthase                   |
| mMTCH                              | 5,10-methenyltetrahydrofolate cyclohydrolase         |
| mMTD                               | 5,10-methylenetetrahydrofolate dehydrogenase         |
| mNE                                | non-enzymatic conversion                             |
| DMGD                               | dimethylglycine dehydrogenase                        |
| SDH                                | sarcosine dehydrogenase                              |
| GDC                                | glycine decarboxylase (glycine cleavage system)      |
| Cytosolic folate cycle enzymes     |                                                      |
| cSHMT                              | serinehydroxymethyltransferase                       |
| DHFR                               | dihydrofolate reductase                              |
| cFTD                               | 10-formyltetrahydrofolate dehydrogenase              |
| cFTS                               | 10-formyltetrahydrofolate synthase                   |
| cMTCH                              | 5,10-methenyltetrahydrofolate cyclohydrolase         |
| cMTD                               | 5,10-methylenetetrahydrofolate dehydrogenase         |
| MTHFR                              | 5,10-methylenetetrahydrofolate reductase             |
| AICART                             | aminoimidazolecarboxamide ribonucleotide transferase |
| PGT                                | Phosphoribosyl glycinamidetransformalase             |
| cNE                                | non-enzymatic conversion                             |
| TS                                 | thymidylate synthase                                 |
| Methionine cycle enzymes           |                                                      |
| MAT-I                              | methionine adenosyl transferase I                    |
| MAT-III                            | methionine adenosyl transferase III                  |
| GNMT                               | glycine N-methyltransferase                          |
| DNMT                               | DNA-methyltransferase                                |
| SAAH                               | S-adenosylhomocysteine hydrolase                     |
| MS                                 | methionine synthase                                  |
| BHMT                               | betaine-homocysteine methyltransferase               |
| CBS                                | cystathionine $\beta$ -synthase                      |
| glutathione metabolism enzymes     |                                                      |
| CTGL                               | $\gamma$ -cystathionase                              |
| GCS                                | $\gamma$ -glutamylcysteine synthetase                |
| GS                                 | glutathione synthetase                               |
| GPX                                | glutathione peroxidase                               |
| GR                                 | glutathione reductase                                |

**Table 2 Non-Enzymatic reaction names and acronyms**

| Quinone metabolism reactions | Description                                               |
|------------------------------|-----------------------------------------------------------|
| $R_1$                        | Quinone single electron reduction (reversible)            |
| $R_2$                        | Semiquinone oxidation - superoxide formation (reversible) |
| $R_3$                        | Superoxide dismutation                                    |
| $R_4$                        | Semiquinone reduction (reversible)                        |
| $R_5$                        | Comproportionation                                        |
| $R_6$                        | $GS - H_2Q$ adduct formation (Michael reaction)           |

## Appendix B: Kinetics

### B.1 Quinone redox metabolism kinetics

All quinone redox metabolism kinetics, including  $GS - H_2Q$  adduct formation, are constructed via the law of mass action. Square brackets denote the concentration of a chemical species.

$$R_1 = k_{p1}[Q] - k_{m1}[SQ^{\cdot-}] \quad (1)$$

$$R_2 = k_{p2}k_{O_2}[SQ^{\cdot-}] - k_{m2}[Q][O_2^{\cdot-}] \quad (2)$$

$$R_3 = k_{p3}[O_2^{\cdot-}]^2 \quad (3)$$

$$R_4 = k_{p4}[SQ^{\cdot-}] - k_{m4}[Q] \quad (4)$$

**Table 3** Variable names ( $\mu\text{M}$ )

| Abbreviation                           | Variable names                            |
|----------------------------------------|-------------------------------------------|
| Quinone redox metabolites and ROS      |                                           |
| $Q$                                    | Quinone                                   |
| $SQ\cdot^-$                            | Semiquinone radical anion                 |
| $H_2Q$                                 | Hydroquinone (quinol)                     |
| $H_2O_2$                               | Hydrogen peroxide                         |
| $O_2^-$                                | Superoxide                                |
| mitochondrial folate cycle metabolites |                                           |
| mthf                                   | tetrahydrofolate                          |
| m2cf                                   | 5-10-methylenetetrahydrofolate            |
| m1cf                                   | 5-10-methenyltetrahydrofolate             |
| m10f                                   | 10-formyltetrahydrofolate                 |
| cytosolic folate cycle metabolites     |                                           |
| cthf                                   | tetrahydrofolate                          |
| c2cf                                   | 5-10-methylenetetrahydrofolate            |
| c1cf                                   | 5-10-methenyltetrahydrofolate             |
| c10f                                   | 10-formyltetrahydrofolate                 |
| dhf                                    | dihydrofolate                             |
| 5mf                                    | 5-methyltetrahydrofolate                  |
| aic                                    | P-ribosyl-5-amino-4-imidazole carboxamide |
| methionine cycle metabolites           |                                           |
| met                                    | methionine                                |
| sam                                    | S-adenosylmethionine                      |
| sah                                    | S-adenosylhomocysteine                    |
| hcy                                    | homocysteine                              |
| glutathione metabolites                |                                           |
| cyt                                    | cystathionine                             |
| ccys                                   | cytosolic cysteine                        |
| bcys                                   | blood cysteine                            |
| glc                                    | glutamyl-cysteine                         |
| cgsh                                   | cytosolic glutathione                     |
| bgsh                                   | blood glutathione                         |
| cgsg                                   | cytosolic glutathione disulfide           |
| bgsg                                   | blood glutathione disulfide               |
| other metabolites                      |                                           |
| bgly                                   | blood glycine                             |
| bglu                                   | blood glutamate                           |
| mgly                                   | mitochondrial glycine                     |
| mser                                   | mitochondrial serine                      |
| mcoo                                   | mitochondrial formate                     |
| Cglu                                   | cytosolic glutamate                       |
| Cgly                                   | cytosolic glycine                         |
| Cser                                   | cytosolic serine                          |
| Ccoo                                   | cytosolic formate                         |
| dmg                                    | dimethylglycine                           |
| Src                                    | sarcosine                                 |

**Table 4** Constant variables

| Abbreviation | Description                                 | Concentration ( $\mu\text{M}$ ) |
|--------------|---------------------------------------------|---------------------------------|
| GAR          | glycinamide ribonucleotide                  | 10                              |
| NADPH        | nicotinamide adenine dinucleotide phosphate | 50                              |
| BET          | betaine                                     | 50                              |
| HCHO         | formaldehyde                                | 500                             |
| DUMP         | deoxyuridine monophosphate                  | 20                              |
| Bser         | blood serine                                | 150                             |
| Bmet         | blood methionine                            | 30                              |
| FOL          | total cellular folate                       | 20                              |

Michael-addition derived  $GS - H_2Q$  adduct formation:

$$R_5 = k_{QGS}H[Q](gsh) \quad (5)$$

Superoxide dismutase:

$$R_6 = k_{SOD}[O_2^-]^2 \quad (6)$$

## B.2 Reactions with standard kinetics

The glutathione metabolism model describes all reactions with standard enzyme kinetics using either the Michaelis-Menten term, or by a reversible bi-substrate random-order Michaelis-Menten term:

$$V = \frac{V_{max}[S]}{K_m + [S]} \quad (7)$$

$$V = \frac{V_{max}[S_1][S_2]}{(K_{m1} + [S_1])(K_{m2} + [S_2])} \quad (8)$$

The appropriate kinetic term is apparent when considering the corresponding parameter values in table 5.

**Table 5 Kinetic parameters (time in hours, concentration in  $\mu\text{M}$ ). All parameter values are taken from [1].**

| Parameter     | Literature      | Model    | Parameter   | Literature   | Model   |
|---------------|-----------------|----------|-------------|--------------|---------|
| <b>AICART</b> |                 |          | <b>CTGL</b> |              |         |
| Km,10f        | 5.9-50          | 5.9      | Km,cyt      | 500          | 500     |
| Km,aic        | 10-100          | 100      | Vmax        | -            | 1500    |
| Vmax          | -               | 55000    |             |              |         |
| <b>DHFR</b>   |                 |          | <b>DMGD</b> |              |         |
| Km,dhf        | 0.12-1.9        | 0.5      | Km,dmg      | 50           | 50      |
| Km,NADPH      | 0.3-5.6         | 4.0      | Km,mthf     | -            | 50      |
| Vmax          | 350-23000       | 2000     | Vmax        | -            | 15000   |
| <b>FTD</b>    |                 |          | <b>cFTS</b> |              |         |
| Km,10f        | 0.9-20          | 20       | Km,thf      | 0.1 - 600    | 3       |
| cVmax         | -               | 500      | Km,coo      | 8 - 1000     | 43      |
| mVmax         | -               | 1050     | Vmax        | 100 - 486000 | 3900    |
| <b>mFTS</b>   |                 |          | <b>GDC</b>  |              |         |
| Km,thf        | 0.1 - 600       | 3        | Km,mgly     | 3400-40000   | 3400    |
| Km,coo        | 8 - 1000        | 43       | Km,mthf     | 50           | 50 Vmax |
| 100 - 486000  | 2000            |          | Vmax        | -            | 15000   |
| Km,10f        | -               | 22       |             |              |         |
| <b>GPX</b>    |                 |          | <b>GR</b>   |              |         |
| Km,gsh        | 1330            | 1330     | Km,gsg      | 72, 107      | 107     |
| Km,H2O2       | -               | .09      | Km,NADPH    | 10.4         | 10.4    |
| Vmax          | -               | 4500     | Vmax        | -            | 8925    |
| <b>MTCH</b>   |                 |          | <b>MTD</b>  |              |         |
| Km,1cf        | 4-250           | 250      | Km          | 2-5          | 2       |
| cVmax         | 880-1380000     | 500000   | cVmax       | 520-594000   | 80000   |
| mVmax         | 880-1380000     | 790000   | mVmax       | 520-594000   | 180000  |
| Km,10f        | 20-450          | 100      | Km          | 1-10         | 10      |
| Vmax          | 10.5-1380000    | 20000    | Vmax        | 594000       | 600000  |
| <b>PGT</b>    |                 |          | <b>SAHH</b> |              |         |
| Km            | .9-58           | 4.9      | Km,sah      | 0.75-15.2    | 6.5     |
| Km,GAR        | 520             | 520      | Vmax        | -            | 320     |
| - Vmax        | 6600-16200      | 24300    | Km,hcy      | 56.6-200     | 150     |
|               |                 |          | Vmax        | -            | 4530    |
| <b>SHMT</b>   |                 |          | <b>SDH</b>  |              |         |
| Km,ser        | 350-1300        | 600      | Km,mthf     | -            | 50      |
| Km,thf        | 45-300          | 50       | Vmax        | -            | 15000   |
| cVmax         | 500-162000      | 5200     |             |              |         |
| mVmax         | 500-162000      | 11440    |             |              |         |
| Km,gly        | 3000-10000      | 10000    |             |              |         |
| Km            | 3200-10000      | 3200     |             |              |         |
| cVmax         | 12600-120000000 | 15000000 |             |              |         |
| mVmax         | 12600-120000000 | 30000000 |             |              |         |
| <b>TS</b>     |                 |          |             |              |         |
| Km,DUMP       | 5-37            | 6.3      |             |              |         |
| Km            | 10-45           | 14       |             |              |         |
| Vmax          | 30-4200         | 5000     |             |              |         |

### B.3 Reactions with non-standard kinetics

Reed et. al. [1] provide a thorough description of the non-standard reaction kinetics in terms. As such, the reader is directed to their study for the derivation of these equations. This section will outline the kinetics and parameter values only.

#### B.3.1 BHMT

$$V = e^{.0021(sam + sah)}e^{.002(102.6)} \frac{V_{max}[hcy][BET]}{(K_{m1} + [hcy])(K_{m2} + [BET])} \cdot \left( \frac{H_2O_2 + K_a}{ssH_2O_2 + K_i} \right) \quad (9)$$

| Parameter  | Value |
|------------|-------|
| $K_{m1}$   | 12    |
| $K_{m2}$   | 100   |
| $V_{max}$  | 2160  |
| $ssH_2O_2$ | 0.01  |
| $K_i$      | 0.01  |

#### B.3.2 CBS

$$V = \left( \frac{V_{max}[hcy][cser]}{(K_{m1} + [hcy])(K_{m2} + [cser])} \right) \left( \frac{(1.086)(sam + sah^2)}{(30)^2 + (sam + sah)^2} \right) \left( \frac{H_2O_2 + K_a}{ssH_2O_{K_a}} \right) \quad (10)$$

| Parameter  | Value  |
|------------|--------|
| $K_{m1}$   | 1000   |
| $K_{m2}$   | 2000   |
| $V_{max}$  | 420000 |
| $ssH_2O_2$ | 0.035  |
| $K_a$      | 0.01   |

#### B.3.3 DNMT

$$V = \frac{V_{max}(sam)}{K_m(1 + \frac{sah}{K_i} + sam)} \quad (11)$$

| Parameter | Value |
|-----------|-------|
| $K_m$     | 1.4   |
| $V_{max}$ | 180   |
| $K_i$     | 1.4   |

B.3.4 GCS

$$V = \frac{V_{max}((cys)(glu) - \frac{(glc)}{K_e})}{K_m^{cys} K_m^{glu} + K_m^{cys}(glu) + K_m^{glu}(cys) \left(1 + \frac{(gsh)}{k_i} + 1 + \frac{(glu)}{k_m^{glu}}\right) + \frac{(glu)}{K_m^{glu}} + \frac{(glc)}{K_p} + \frac{(gsh)}{K_i}} \cdot \left(\frac{ssH_2O_2 + K_a}{H_2O_2 + K_a}\right) \quad (12)$$

| Parameter   | Value |
|-------------|-------|
| $V_{max}$   | 3600  |
| $K_e$       | 5597  |
| $K_m^{cys}$ | 100   |
| $K_m^{glu}$ | 1900  |
| $K_i$       | 8200  |
| $K_p$       | 300   |
| $K_a$       | 0.01  |
| $ssH_2O_2$  | 0.01  |

B.3.5 GNMT

$$V = \left(\frac{V_{max}(sam)(gly)}{(K_{m1} + sam)(K_{m2} + gly)}\right) \left(\frac{1}{1 + \frac{сах}{K_i}}\right) \left(\frac{4.8}{0.35 + 5mf}\right) \quad (13)$$

| Parameter | Value |
|-----------|-------|
| $V_{max}$ | 260   |
| $K_{m1}$  | 63    |
| $K_{m2}$  | 130   |
| $K_i$     | 18    |

GS

$$V = \frac{V_{max}((gsh)(glc) - \frac{(gsh)}{K_e})}{K_m^{glc} K_m^{gly} + (glc)K_m^{gly} + (gly)K_m^{glc} \left(1 + \frac{(glc)}{K_m^{glc}}\right) + \frac{(gsh)}{K_p}} \quad (14)$$

| Parameter   | Value |
|-------------|-------|
| $V_{max}$   | 5400  |
| $K_e$       | 5600  |
| $K_m^{gly}$ | 300   |
| $K_m^{glc}$ | 22    |
| $K_i$       | 30    |

## B.3.6 MAT-I

$$V = \left( \frac{V_{max}(met)}{K_m + met} \right) (0.23 + (0.8)e^{-0.0026(sam)}) \left( \frac{K_i + 66.71}{K_i + gsg} \right) \quad (15)$$

| Parameter | Value |
|-----------|-------|
| $V_{max}$ | 260   |
| $K_i$     | 2140  |
| $K_m$     | 41    |

## B.3.7 MAT-III

$$V = \left( \frac{V_{max}(met)^{1.21}}{K_m + (met)^{1.21}} \right) \left( 1 + \frac{(7.2)(sam)^2}{(K_a)^2 + (sam)^2} \right) \left( \frac{K_i + 66.71}{K_i + gsg} \right) \quad (16)$$

| Parameter | Value |
|-----------|-------|
| $V_{max}$ | 220   |
| $K_i$     | 4030  |
| $K_a$     | 360   |
| $K_m$     | 300   |

## B.3.8 MS

$$V = \frac{V_{max}(5mf)(hcy)}{(K_m^{5mf} + 5mf)(K_m^{hcy} + hcy)} \left( \frac{ssH_2O_2 + K_i}{H_2O_2 + K_i} \right) \quad (17)$$

| Parameter   | Value |
|-------------|-------|
| $V_{max}$   | 500   |
| $K_m^{5mf}$ | 25    |
| $K_m^{hcy}$ | 1     |
| $K_i$       | 0.01  |
| $ssH_2O_2$  | 0.01  |

## B.3.9 MTHFH

$$V = \frac{V_{max}(2cf)(NADPH)}{(K_{m1} + 2cf)(K_{m2} + NADPH)} \cdot \frac{72}{10 + sam - sah} \quad (18)$$

| Parameter | Value |
|-----------|-------|
| $V_{max}$ | 5300  |
| $K_{m1}$  | 50    |
| $K_{m2}$  | 16    |

### B.3.10 NE

$$V = k_1(thf)(HCHO) - k_2(2cf) \quad (19)$$

| Parameter            | Value |
|----------------------|-------|
| $k_1$                | 0.03  |
| $k_2$ (Cytosol)      | 22    |
| $k_2$ (Mitochondria) | 20    |

### B.4 Transport kinetics

The general formula for the kinetics of transport between the blood and the cytosol compartments take the following form:

$$V = \frac{V_{max}[bAA]}{K_m + [bAA]} - k_{out}[cAA] \quad (20)$$

where  $AA$  represents an amino acid and prefixes  $b$  and  $c$  refer to the blood and cytosolic compartments respectively. The formulation of the transport kinetics used in the glutathione metabolism model is explained in great detail in the Reed et. al manuscript [1]. Briefly, the transporter velocities from the blood to the cytosol, or mitochondria to the cytosol are denoted  $V_{bSERc}$  and  $V_{mSERc}$  respectively. The transporter units are  $\mu\text{M}/\text{hr}$  increase in the cytosol.

### B.5 Quinone redox metabolism parameters

The quinone metabolism parameters were estimated using the LSQNONLIN function in MATLAB, by fitting the triad model to the experimental OCR data representative of hydroquinone auto-oxidation.

## Appendix C: Model ordinary differential equations (ODEs)

The rate of each biochemical reaction is denoted with a  $V$ , representing a velocity of  $\mu\text{Mhr}^{-1}$ . Model variables in different compartments are distinguished with subscripts ( $c, b, m$ ) representing cytosolic, blood and mitochondrial variables.

$$\frac{d}{dt} mthf = V_{mFTD} - V_{mSHMT} - V_{mFTS} - V_{mNE} - V_{GDC} - V_{SDH} - V_{DMGD} \quad (21)$$



**Table 6 Amino acid transport parameters**

| Parameter   | Model value   | Parameter    | Model value |
|-------------|---------------|--------------|-------------|
| $V_{bGLYc}$ |               | $V_{cGLYm}$  |             |
| $K_m$       | 150           | $K_{m,cgly}$ | 5700        |
| $V_{max}$   | 4600          | $V_{max}$    | 10000       |
| $k_{out}$   | 1             | $K_{m,mgly}$ | 5700        |
| $V_{max}$   | 10000/3       |              |             |
| $V_{bSERc}$ |               | $V_{cSERm}$  |             |
| $K_m$       | 150           | $K_{m,cser}$ | 5700        |
| $V_{max}$   | 2700          | $V_{max}$    | 10000       |
| $k_{out}$   | 1             | $K_{m,mser}$ | 5700        |
| $V_{max}$   | 10000/3       |              |             |
| $V_{bMETc}$ | $V_{mHCOOHc}$ |              |             |
| $K_m$       | 150           | $k_{in}$     | 100/3       |
| $V_{max}$   | 913           | $k_{out}$    | 100         |
| $k_{out}$   | 1             |              |             |
| $V_{bCYSc}$ | $V_{bGlutc}$  |              |             |
| $K_m$       | 2100          | $K_m$        | 300         |

**Table 7 GSH and GSSG transport parameters**

| Parameter    | Model value  | Parameter | Model value |
|--------------|--------------|-----------|-------------|
| $V_{cqshHb}$ | $V_{cqshLb}$ |           |             |
| $K_m$        | 150          | $K_m$     | 3000        |
| $V_{max}$    | 150          | $V_{max}$ | 1100        |
| Hill         | 3            |           |             |
| $V_{cqsqHb}$ | $V_{cqsqLb}$ |           |             |
| $K_m$        | 1250         | $K_m$     | 7100        |
| $V_{max}$    | 40           | $V_{max}$ | 4025        |

**Table 8 Quinone redox metabolism parameters**

| Parameter | Model value | Unit                 |
|-----------|-------------|----------------------|
| $k_{p1}$  | 3600        | $hr^{-1}$            |
| $k_{m1}$  | 72000       | $hr^{-1}$            |
| $k_{p2}$  | 0.11        | $\mu M^{-1} hr^{-1}$ |
| $k_{m2}$  | 0.36        | $\mu M^{-1} hr^{-1}$ |
| $k_{p3}$  | 1.44        | $\mu M^{-1} hr^{-1}$ |
| $k_{p4}$  | 72000       | $hr^{-1}$            |
| $k_{m4}$  | 27000       | $hr^{-1}$            |
| $k_{O2}$  | 293.80      | $\mu M$              |

**Table 9 Glutathione adduct formation and superoxide dismutase parameters**

| Parameter | Model value | Unit                 | Ref |
|-----------|-------------|----------------------|-----|
| $k_{QGS}$ | 0.0036      | $\mu M^{-1} hr^{-1}$ | [2] |
| $k_{SOD}$ | 144         | $\mu M^{-1} hr^{-1}$ | [2] |

$$\frac{d}{dt} m2cf = V_{mSHMT} + V_{mNE} + V_{mGDC} - V_{mMTD} + V_{SDH} + V_{DMGD} \quad (22)$$

$$\frac{d}{dt} m1cf = V_{mMTD} - V_{mMTCH} \quad (23)$$

$$\frac{d}{dt} m10f = V_{mFTS} + V_{mMTCH} - V_{mFTD} \quad (24)$$

$$\frac{d}{dt} cthf = V_{mMS} + V_{DHFR} + V_{cFTD} - V_{PGT} - V_{cFTS} - V_{cSHMT} + V_{cNE} \quad (25)$$

$$\frac{d}{dt} c2cf = V_{cSHMT} + V_{cNE} - V_{TS} - V_{MTHFR} - V_{cMTD} \quad (26)$$

$$\frac{d}{dt} c1cf = V_{cMTD} - V_{cMTCH} + V_{cFTD} - V_{PGT} - V_{cFTS} - V_{cSHMT} + V_{cNE} \quad (27)$$

$$\frac{d}{dt} c10f = V_{cFTS} + V_{cMTCH} - V_{cFTD} - V_{ART} - V_{PGT} \quad (28)$$

$$\frac{d}{dt} dhf = V_{TS} - V_{DHFR} \quad (29)$$

$$\frac{d}{dt} 5mf = V_{MTHFR} - V_{MS} \quad (30)$$

$$\frac{d}{dt} aic = V_{PGT} - V_{ART} \quad (31)$$

$$\frac{d}{dt} met = V_{BHMT} + V_{MS} + V_{cMetc} - V_{MATI} - V_{MATIII} \quad (32)$$

$$\frac{d}{dt} sam = V_{MATI} + V_{MATIII} - V_{GNMT} - V_{DNMT} - \quad (33)$$

$$\frac{d}{dt} sah = V_{GNMT} + V_{DNMT} - V_{SAHH} \quad (34)$$

$$\frac{d}{dt} hcy = V_{SAHH} - V_{CBS} - V_{BHMT} - V_{MS} \quad (35)$$

$$\frac{d}{dt} mgly = V_{mSHMT} - 3V_{mGLYc} - V_{GDC} + V_{SDH} \quad (36)$$

$$\frac{d}{dt} mser = -3V_{mSERc} - V_{mSHMT} \quad (37)$$

$$\frac{d}{dt} mcoo = -3V_{mHCOOHc} - V_{mFTS} \quad (38)$$

$$\frac{d}{dt} cgly = V_{bGLYc} + V_{cSHMT} + V_{mGLYc} - V_{GNMT} - V_{GS} \quad (39)$$

$$\frac{d}{dt} cser = V_{bSERc} + V_{mSERc} - V_{cSHMT} - V_{CBS} - (1.2) \quad (40)$$

$$\frac{d}{dt} ccoo = V_{mHCOOHc} - V_{cFTS} \quad (41)$$

$$\frac{d}{dt} dmg = V_{BHMT} - V_{DMDG} \quad (42)$$

$$\frac{d}{dt} src = V_{GNMT} + V_{DMGD} - V_{SDH} \quad (43)$$

$$\frac{d}{dt} cyt = V_{CBS} - V_{CTGL} \quad (44)$$

$$\frac{d}{dt} clys = V_{CTGL} - V_{GCS} + V_{bcYS} - (.35) \frac{[clys]^2}{200} \quad (45)$$

$$\frac{d}{dt} cglu = V_{bGLUc} - V_{GCS} - (0.7)glu \quad (46)$$

$$\frac{d}{dt} glc = V_{GCS} - V_{GS} \quad (47)$$

$$\frac{d}{dt} cgsgh = V_{GS} - V_{cgsghHb} - V_{cgsghLb} - 2V_{GPX} + 2V_{GR} - (.002)cgsgh - R_5 \quad (48)$$

$$\frac{d}{dt} cgsgh = V_{GPX} - V_{GR} - V_{cgsghHb} - V_{cgsghLb} - (.1)cgsgh \quad (49)$$

$$\frac{d}{dt} bglg = (90)bgsgh + (2)(67.5)bgsg + V_{oGLYb} - V_{bGLYc} - (.1)V_{bglg} \quad (50)$$

$$\frac{d}{dt} bcys = (90)bgsgh + (2)(67.5)bgsg + V_{oCYSb} - V_{bCYS} - (.35)V_{bcys} \quad (51)$$

$$\frac{d}{dt} bgsgh = V_{cgsghHbGPX} + V_{cgsghLb} - (.7)bgsgh - (90)bgsgh \quad (52)$$

$$\frac{d}{dt} bgsg = V_{cgsghHb} + V_{cgsghLb} - (7.5)bgsg - (67.5)bgsg \quad (53)$$

$$\frac{d}{dt} bglu = (90)bgsgh + (2)(67.5)bgsg - V_{oGLUb} - (.1)bglu \quad (54)$$

$$\frac{d}{dt} Q = -R_1 + R_2 - R_5 \quad (55)$$

$$\frac{d}{dt} SQ^- = +R_1 - R_2 - R_4 \quad (56)$$

$$\frac{d}{dt} H_2Q = +R_4 \quad (57)$$

$$\frac{d}{dt} O_2^- = +R_2 - 2R_3 - 2R_6 \quad (58)$$

$$\frac{d}{dt} cH_2O_2 = +R_3 - V_{GPX} + R_6 \quad (59)$$

## Appendix D: Model validation figures

The combined model was validated by recapitulating figures 2 and 6 from the Reed et. al glutathione metabolism model manuscript [1], in order to confirm that first, addition of quinone redox metabolism does not alter glutathione metabolism when no quinone is present, and second, that the curated model downloaded from the BioModels database was in good accordance with the original published model.

D.1 Reed. et. al. glutathione metabolism Figure 2: GSH half-life

D.2 Reed. et. al. glutathione metabolism Figure 6: effects of oxidative stress

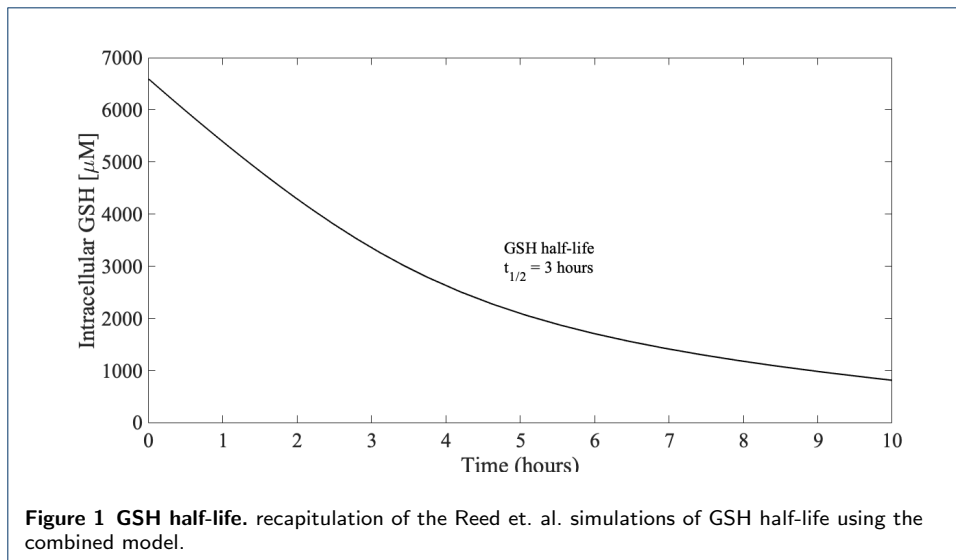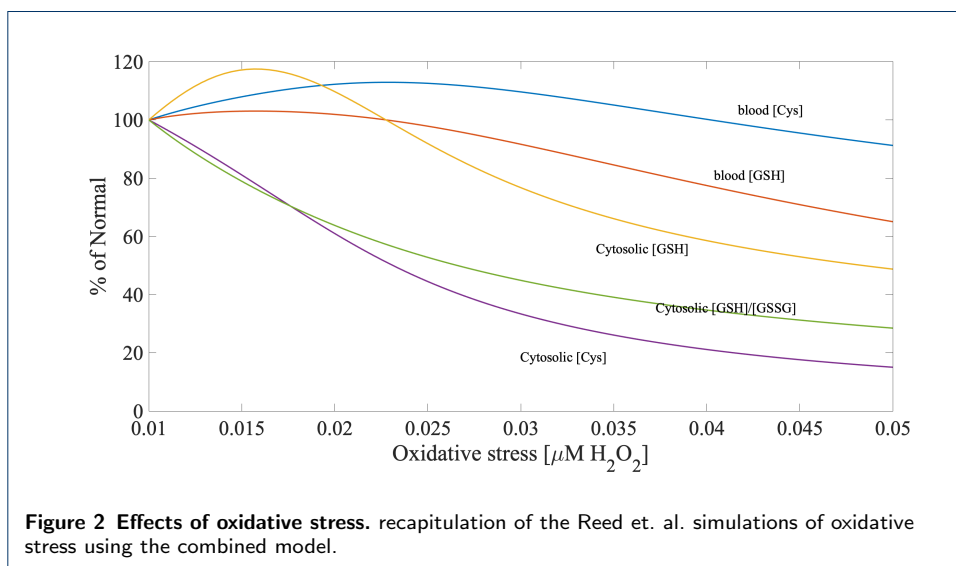

### Appendix E: Reduced and comproportionation model fits

The goodness of fit between the OCR data and the reduced and comproportionation models are illustrated in this section. The reduced model falls significantly short of delivering an accurate representation of the OCR data, suggesting that it is mechanistically insufficient to simulate auto-oxidation of doxorubicin. The comproportionation model however, provides a good fit, similar to that of the triad model. However, as described in the manuscript, the triad model is chosen using the AIC-BIC criterion based on the fewer amount of parameters.

#### E.1 Reduced model fit

#### E.2 Comproportionation model fit

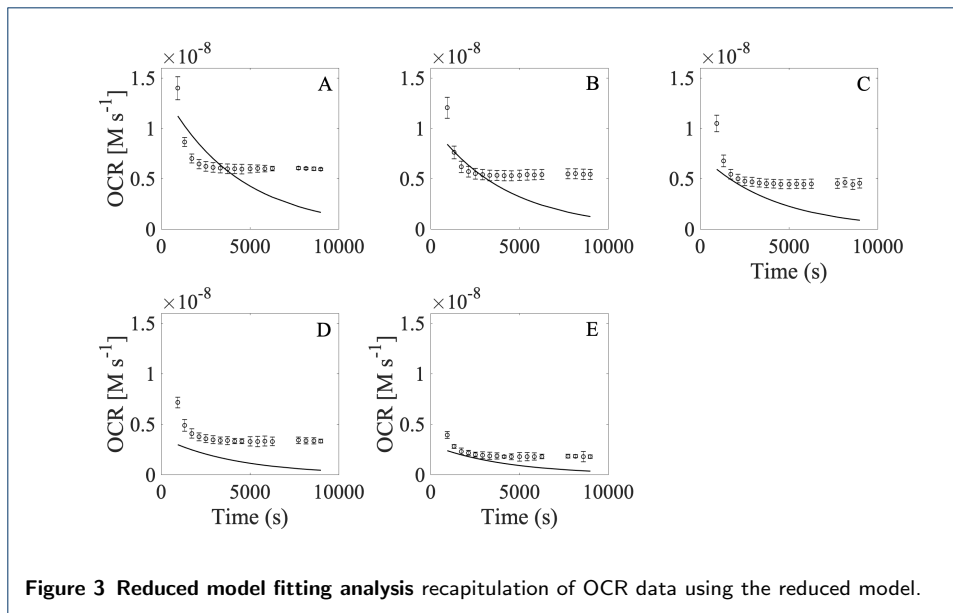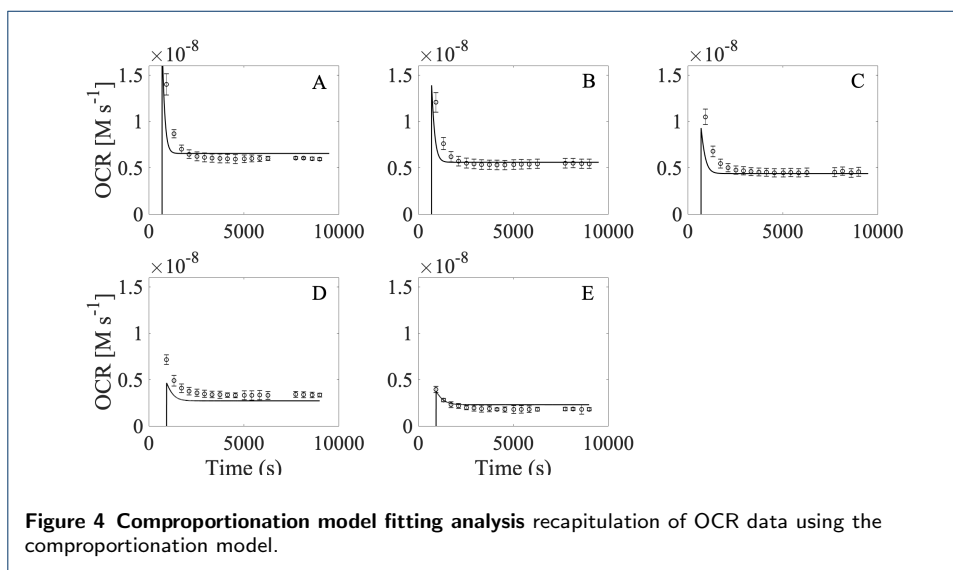

### Appendix F: Initial conditions

Initial concentrations for all model variables are split into two sections: 1) initial conditions for the quinone redox metabolism and 2) initial conditions for the glutathione metabolism. Quinone redox metabolism initial conditions for the 50  $\mu M$  are described in Table 10:

**Table 10** Quinone redox metabolism initial conditions

| Variable         | Conc [ $\mu M$ ] |
|------------------|------------------|
| $[Q]$            | 50               |
| $[SQ^{\cdot-}]$  | 0                |
| $[H_2Q]$         | 0                |
| $[O_2^{\cdot-}]$ | 0                |
| $[H_2O_2]$       | 0.01             |

The remaining initial conditions for all glutathione metabolism variables can be found on the BioModels Database: [www.ebi.ac.uk/biomodels-main/BIOMD0000000268](http://www.ebi.ac.uk/biomodels-main/BIOMD0000000268)

**Author details**

<sup>1</sup>Department of Applied Mathematics, Liverpool John Moores University, Byrom Street, Liverpool, UK. <sup>2</sup>EPSRC Liverpool Centre for Mathematics in Healthcare, Department of Mathematical Sciences, University of Liverpool, Liverpool, UK. <sup>3</sup>Institute for Risk and Uncertainty, University of Liverpool, Liverpool, UK. <sup>4</sup>School of Pharmacy and Biomolecular Sciences, Liverpool John Moores University, Liverpool, UK. <sup>5</sup>GlaxoSmithKline, David Jack Centre for Research, Ware, UK. <sup>6</sup>MRC Centre for Drug Safety Science, Department of Molecular and Clinical Pharmacology, University of Liverpool, Liverpool, UK.

**References**

1. Reed, M.E., Thomas, R.L., J, P., J, J.S., Ulrich, C.M., Nijhout, H.F.: A mathematical model of glutathione metabolism. *Theor. Biol. Med. Model.* **8**, 919–962 (2008)
2. Song, Y., Buettner, G.R.: Thermodynamic and kinetic considerations for the reaction of semiquinone radicals to form superoxide and hydrogen peroxide. *Free Radic. Biol. Med.* **49** (2010)
